# Supplementary material for: Leukocyte-Derived Extracellular Vesicles in Blood with and without EpCAM Enrichment
Source: PubMed Central journal article supplement (PMC6721753; doi:10.3390/cells8080937), 2019-08-20
Supplement: cells-08-00937-s001.pdf [file cells-08-00937-s001.pdf]

**A. 10x/0.45 NA objective**

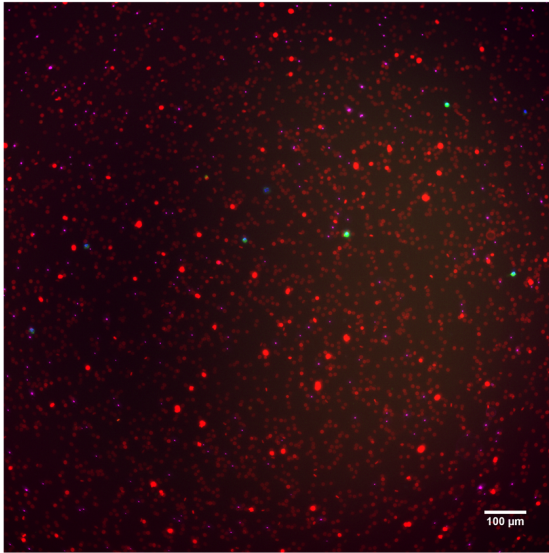

**Hoechst, CD235a, CD61, CD45**

**B. 60x/0.7 NA objective**

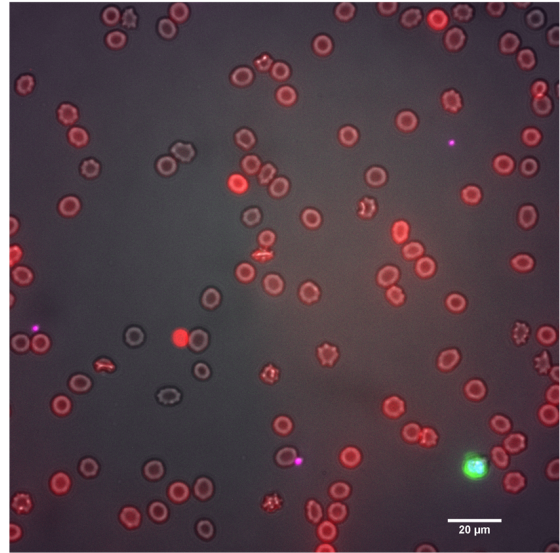

**Hoechst, CD235a, CD61, CD45, brightfield**

**Supplementary Figure S1:** Examples of composite immunofluorescence images of blood samples without EpCAM enrichment, obtained with an inverted scanning fluorescence microscope using a 10×/0.45 NA (Panel A) and a 60×/0.7 NA objective (Panel B). The images that were obtained with the 10× objective were used as an input in the open-source ACCEPT software for the automated enumeration of the different cell and EV populations.

### Leukocyte-derived EVs in whole blood

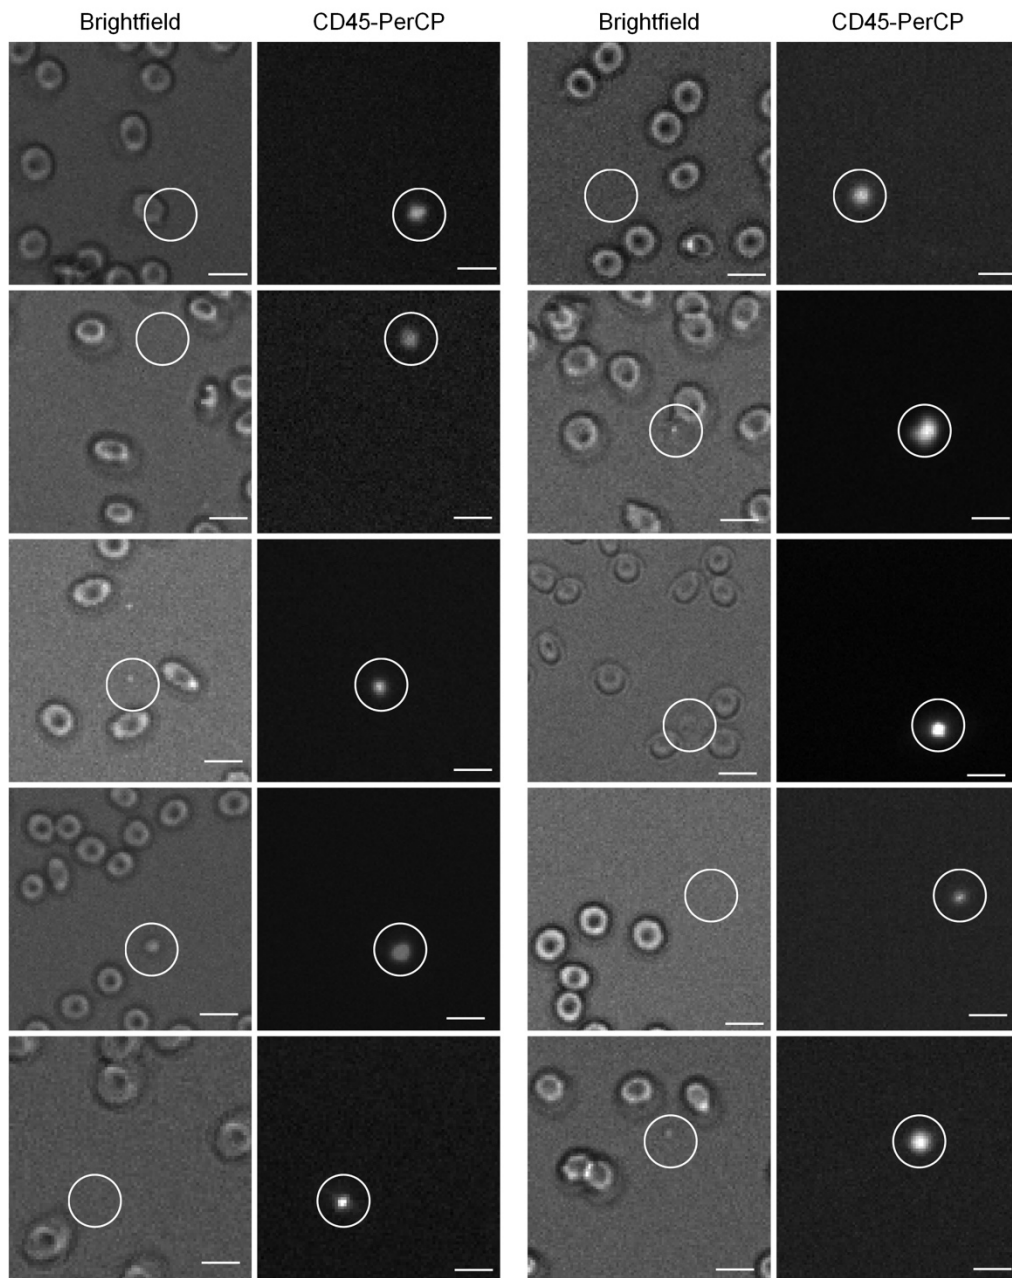

**Supplementary Figure S2:** Examples of brightfield and immunofluorescence images of leukocyte-derived Extracellular Vesicles, enclosed within circles. Scale bars indicate 10  $\mu\text{m}$ .
